# Supplementary material for: Uncoupling of sexual reproduction from homologous recombination in homozygous Oenothera species
Source: PubMed Central journal article supplement — Heredity (Edinb). 2011 Mar 30;107(1):87–94. doi: 10.1038/hdy.2010.171 (PMC3186113; doi:10.1038/hdy.2010.171), 2011-03-30
Supplement: hdy2010171x1.pdf [file hdy2010171x1.pdf]

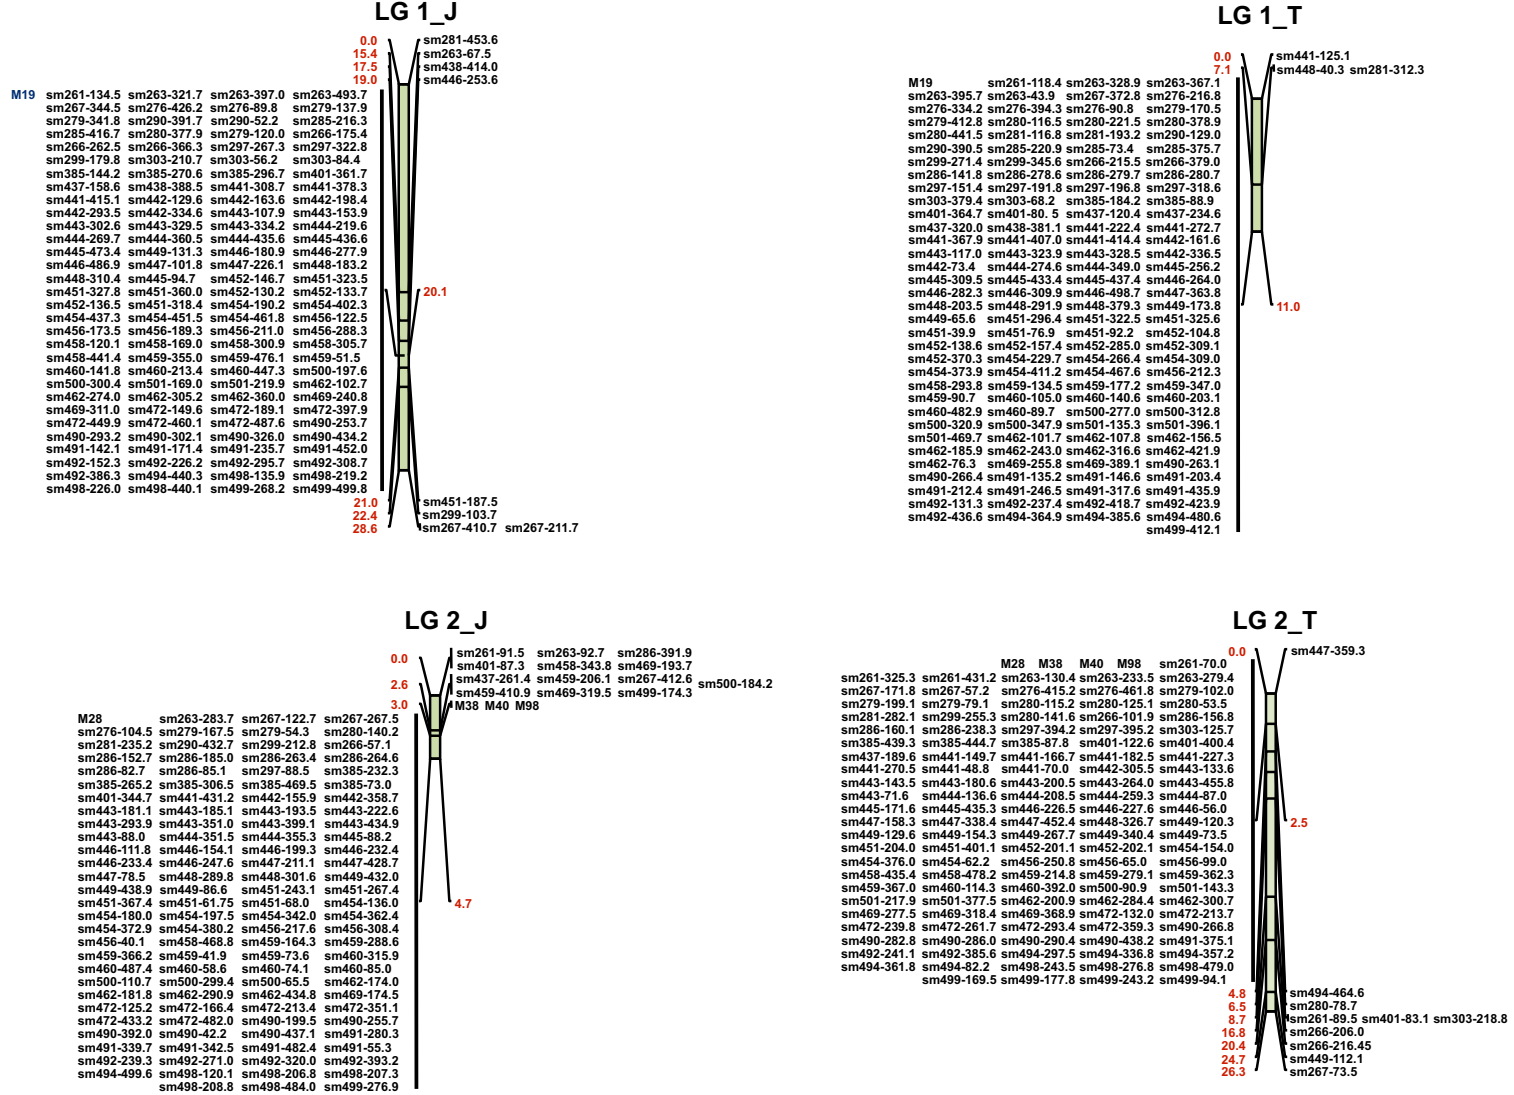

Figure S1

continued

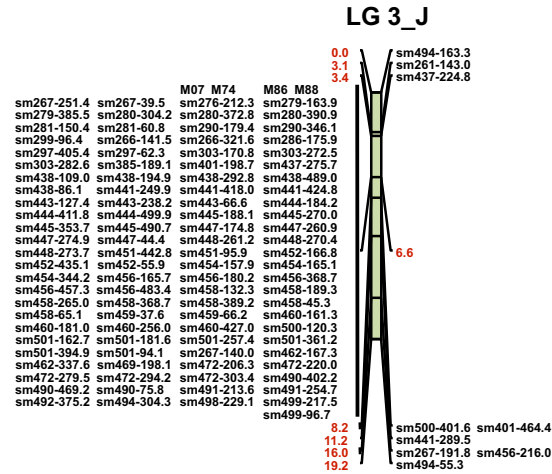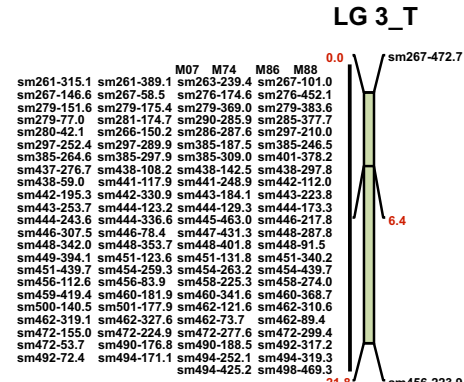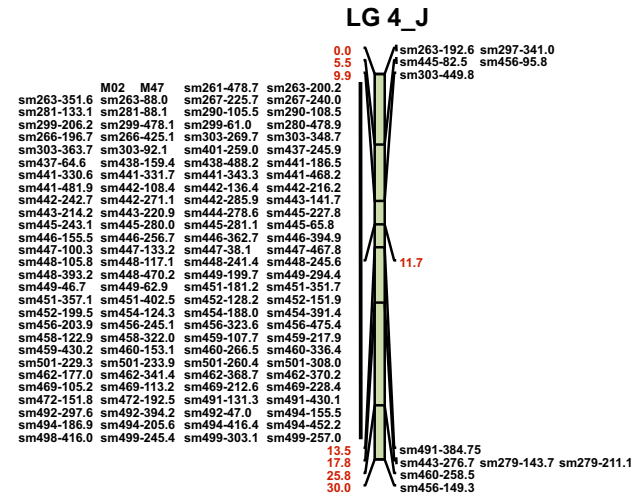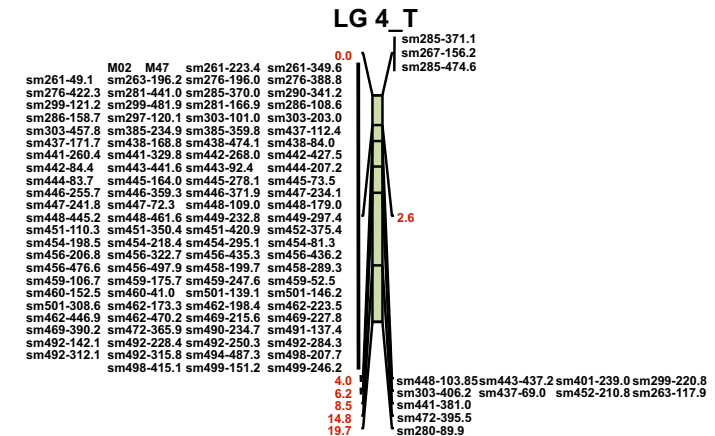

continued

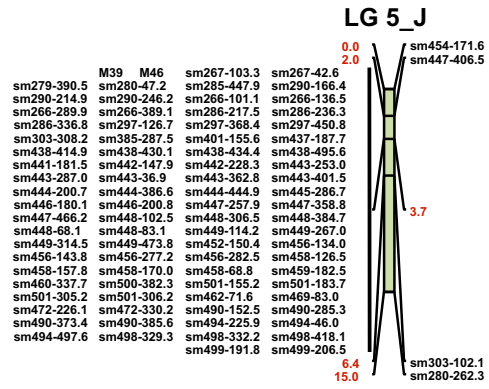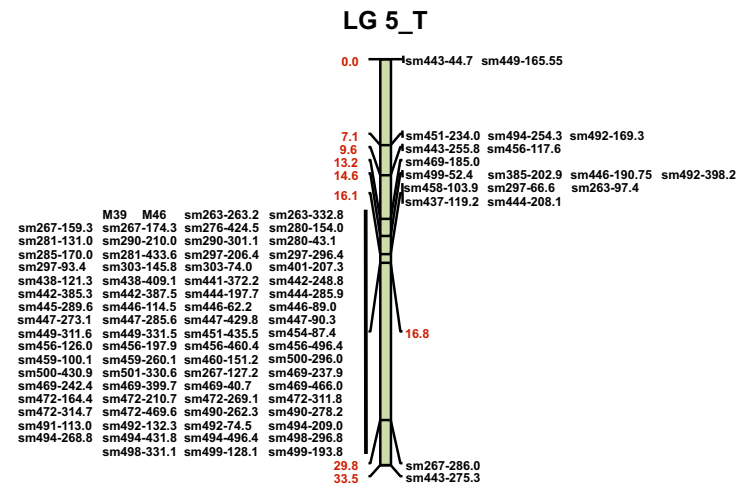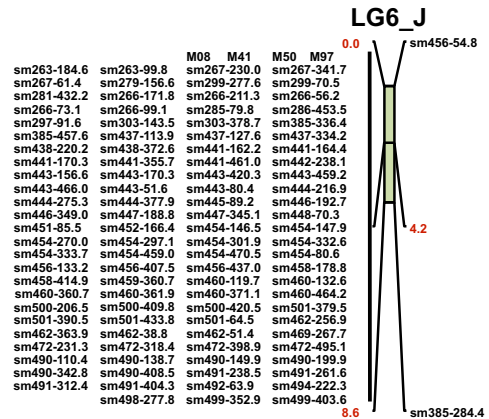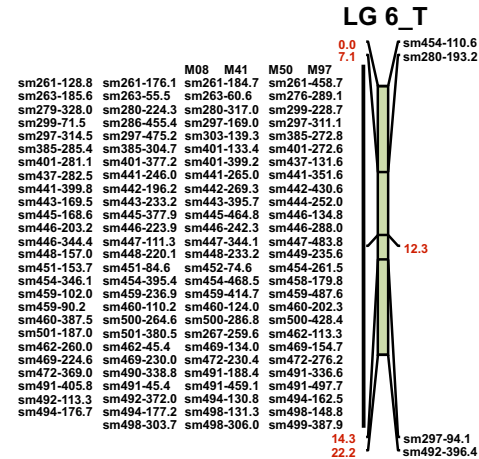

continued

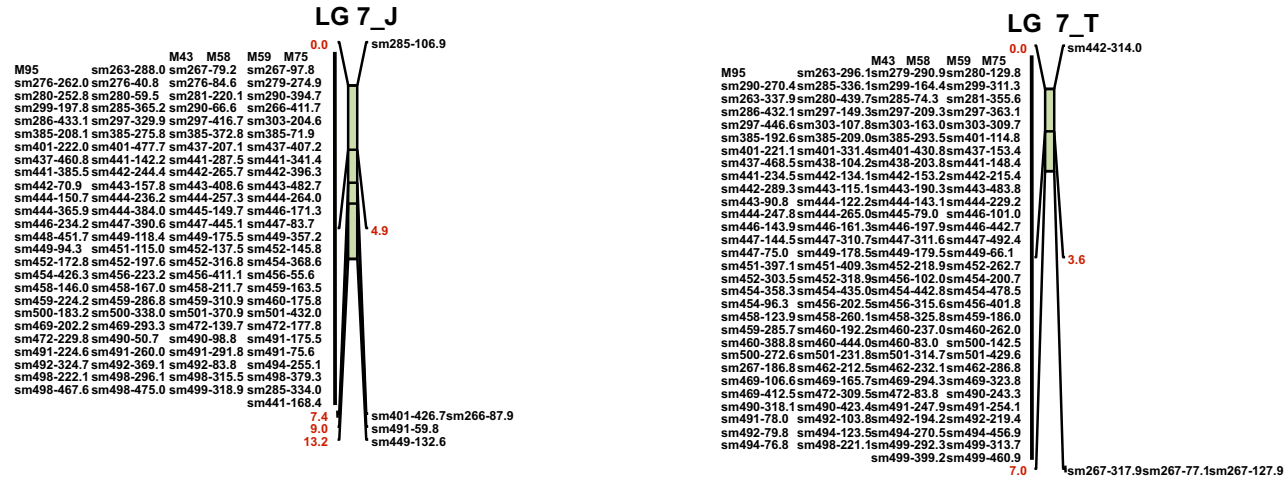

**Figure S1.** Genetic maps of two *Oenothera* species. *Oenothera elata* subsp. *hookeri* strain johansen (J) and of *Oenothera grandiflora* strain tuscaloosa (T) comprise 778 and 804 molecular markers based on the analysis of 80 meioses, respectively. The lengths of the linkage groups (LG) are given in cM.
